# Supplementary material for: Cysteine Sulfoxides Enhance Steroid Hormone Production via Activation of the Protein Kinase A Pathway in Testis-Derived I-10 Tumor Cells
Source: PubMed Central journal article supplement (PMC7587355; doi:10.3390/molecules25204694), 2020-10-14
Supplement: molecules-25-04694-s001.pdf [file molecules-25-04694-s001.pdf]

Supplementary Material

## Cysteine Sulfoxides Enhance Steroid Hormone Production via Activation of the Protein Kinase A Pathway in Testis-Derived I-10 Tumor Cells

Yuya Nakayama <sup>1,2,3,\*†</sup>, Hsin-Jung Ho <sup>3,4,†</sup>, Miki Yamagishi <sup>2</sup>, Hiroyuki Ikemoto <sup>1</sup>, Michio Komai <sup>3</sup> and Hitoshi Shirakawa <sup>3</sup>

<sup>1</sup> Health Care Research Center, Nisshin Pharma Inc., Saitama 356-8511, Japan; ikemoto.hiroyuki@nisshin.com

<sup>2</sup> Research Center for Basic Science, Research and Development, Quality Assurance Division, Nisshin Seifun Group, Inc., Saitama 356-8511 Japan; yamagishi.miki@nisshin.com

<sup>3</sup> Laboratory of Nutrition, Graduate School of Agricultural Science, Tohoku University, Sendai 980-8572, Japan; hsinjung@hs.hokudai.ac.jp (H.-J.H.); mkomai@m.tohoku.ac.jp (M.K.); shirakah@tohoku.ac.jp (H.S.)

<sup>4</sup> Faculty of Health Sciences, Hokkaido University, Sapporo 060-0812, Japan

\* Correspondence: nakayama.yuya@nisshin.com; Tel.: +81-49-267-3928; Fax: +81-49-266-2749

† These authors contributed equally to this work.

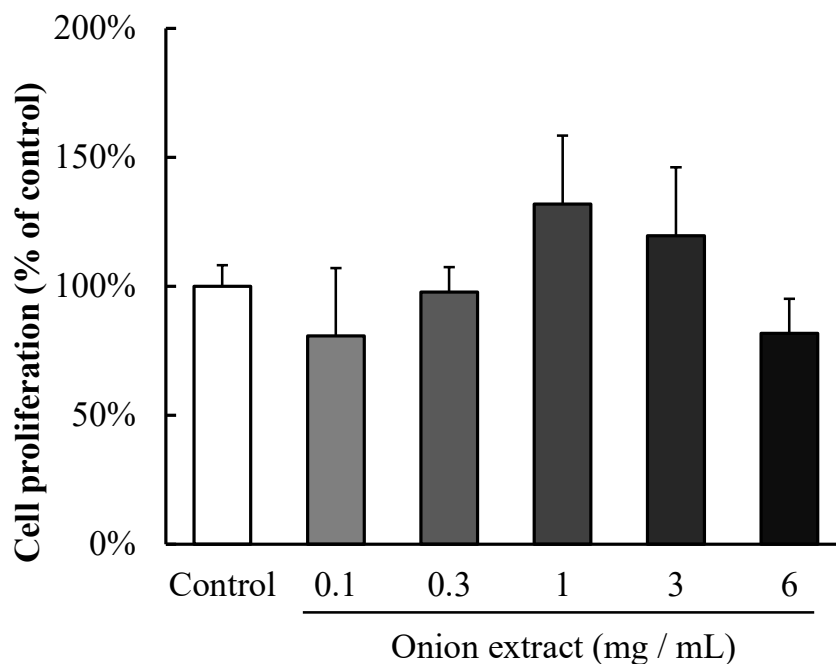

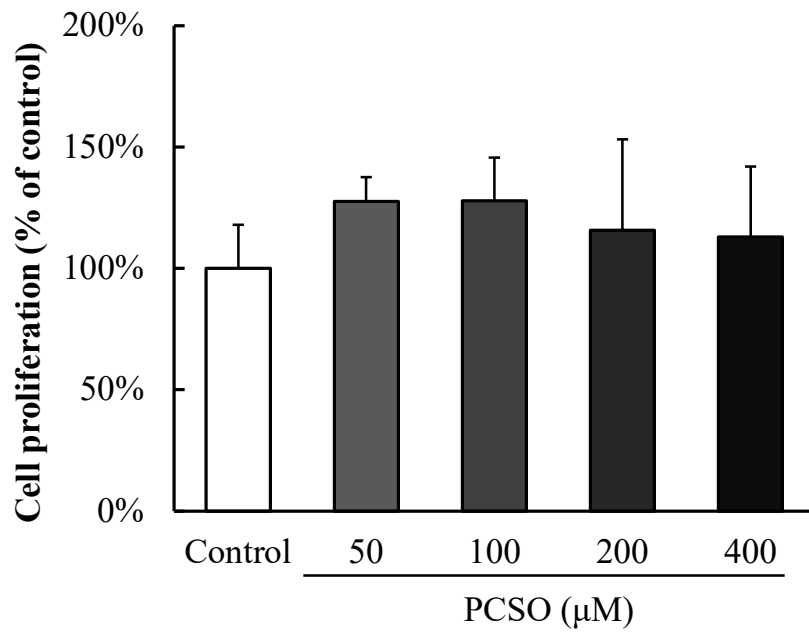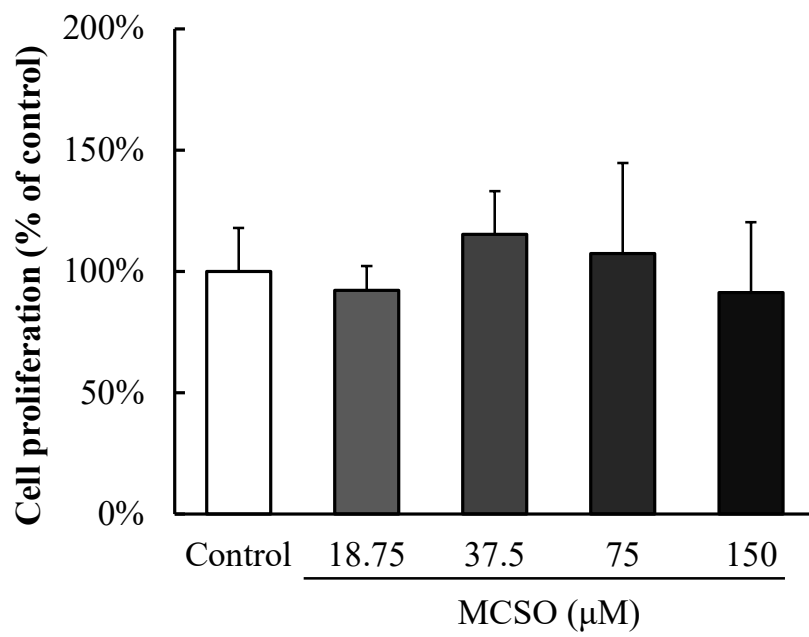

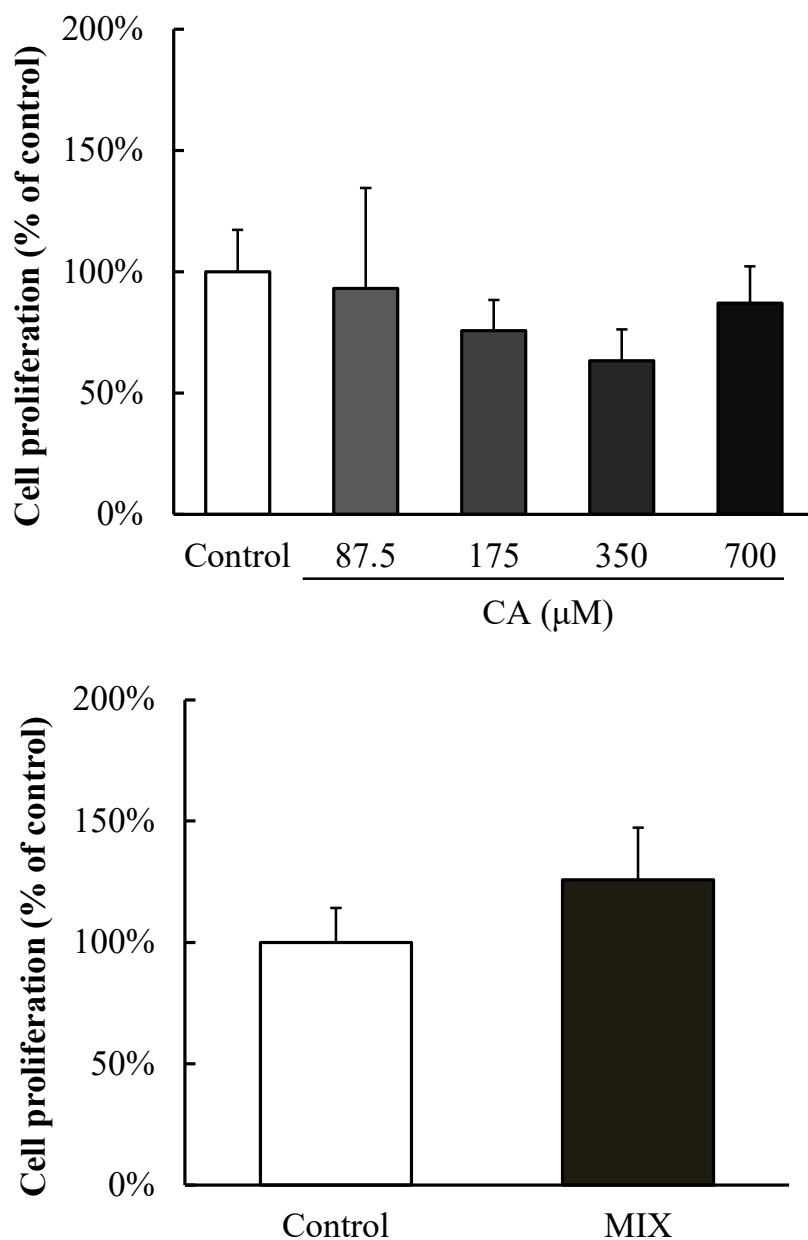

**Figure S1.** Effects of onion extract (PCSO, CA, MCSO, and MIX [PCSO 400 μM, MCSO 150 μM, and CA 700 μM]) on cytotoxicity in I-10 cells. Data are presented as mean ± standard deviation (n = 5). PCSO: propenyl-L-cysteine sulfoxide; MCSO: S-methyl-L-cysteine sulfoxide; CA: cycloalliin.

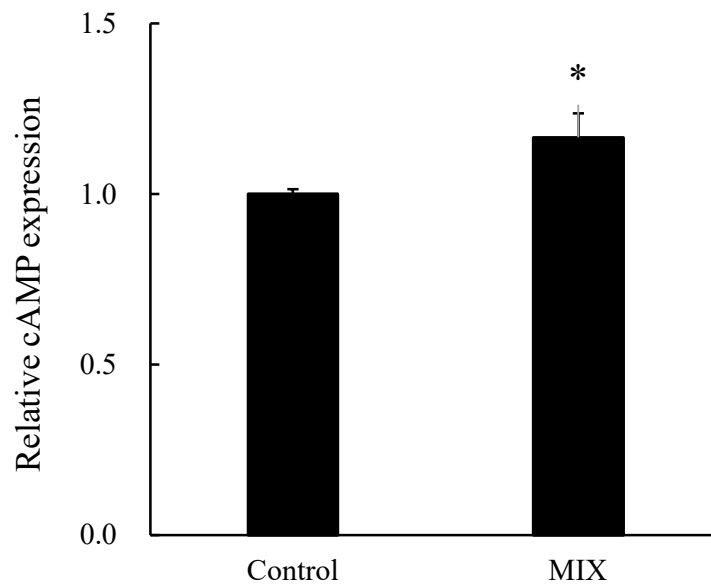

**Figure S2.** The enhancement of cAMP production by MIX (PCSO 400  $\mu$ M, MCSO 150  $\mu$ M, and CA 700  $\mu$ M) in I-10 cells. Data are presented as mean  $\pm$  standard deviation ( $n = 3$ ). \* $p < 0.05$  vs. control. PCSO: propenyl-L-cysteine sulfoxide; MCSO: S-methyl-L-cysteine sulfoxide; CA: cycloalliin; cAMP: cyclic adenosine monophosphate.
